# Supplementary material
Source: PubMed Central journal article supplement (PMC6498003)
Supplement: JCM.01922-18-s0001.pdf [file JCM.01922-18-s0001.pdf]

## Supplemental Figures and Table

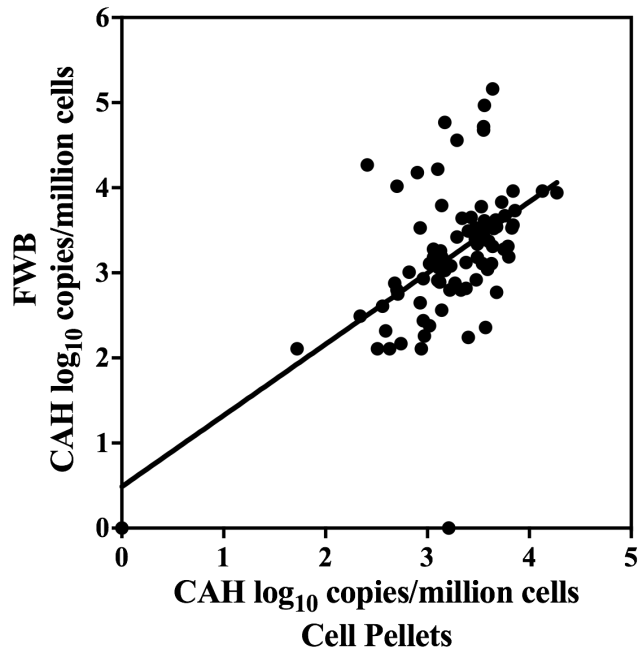

Figure S1. Regression Analysis of Cell-associated HIV (CAH) Results for Cell Pellets and Frozen Whole Blood (FWB). CAH values showed a positive and significant correlation between cell pellets and FWB ( $R^2= 0.3114$ ;  $p < 0.0001$ , 2-tailed t-test). CAH results were not significantly different between cell pellets and FWB ( $P=0.6655$ , unpaired t-test).

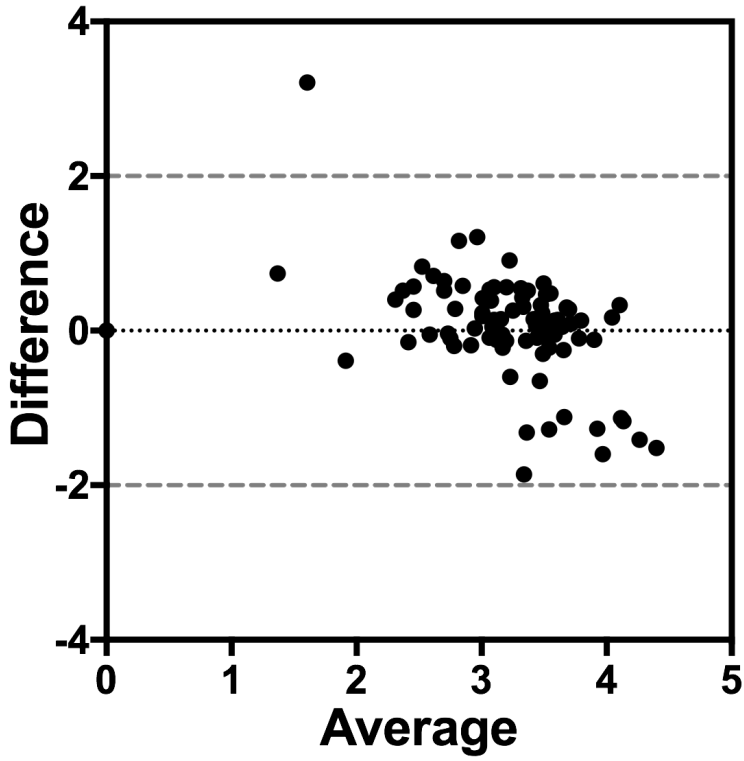

Figure S2. Bland-Altman Plot of Cell-associated HIV (CAH) values for Cell Pellets and Frozen Whole Blood. CAH data was analyzed for differences between the CAH of matched cell pellets and FWB. One outlier greater than 2 SD is shown.

| <b>Fiebig Stage</b> |                 | <b>Weeks on ART</b> |                   |                   |                   |
|---------------------|-----------------|---------------------|-------------------|-------------------|-------------------|
|                     |                 | <b>0</b>            | <b>1</b>          | <b>8</b>          | <b>60</b>         |
| <b>I</b>            | <b>II</b>       | <b>0.0003*</b>      | <b>0.0029</b>     | <b>&lt;0.0001</b> | <b>&lt;0.0001</b> |
| <b>I</b>            | <b>III</b>      | <b>0.0019</b>       | <b>0.0076</b>     | <b>0.0052</b>     | <b>0.0178</b>     |
| <b>II</b>           | <b>III</b>      | <b>0.1189</b>       | <b>0.5459</b>     | <b>0.2271</b>     | <b>0.3276</b>     |
| <b>I</b>            | <b>II - III</b> | <b>&lt;0.0001</b>   | <b>0.0003</b>     | <b>&lt;0.0001</b> | <b>0.0011</b>     |
| <b>I</b>            | <b>IV - VI</b>  | <b>&lt;0.0001</b>   | <b>&lt;0.0001</b> | <b>&lt;0.0001</b> | <b>&lt;0.0001</b> |
| <b>II – III</b>     | <b>IV - VI</b>  | <b>0.555</b>        | <b>0.0121</b>     | <b>0.0099</b>     | <b>0.0003</b>     |

\* Two-Tailed t-test analysis using Prism 7 software.

Table S1. Statistical significance of cell-associated HIV nucleic acid levels in individuals initiating ART during acute HIV infection.
